# Supplementary material
Source: MDPI journal article supplement (https://www.mdpi.com/2073-4433/12/9/1092)
Supplement: s1 [file s1]

Supplementary

# Vertical Distribution of Aerosols during Deep-Convective Event in the Himalaya Using WRF-Chem Model at Convection Permitting Scale

Prashant Singh <sup>1,2</sup>, Pradip Sarawade <sup>1</sup> and Bhupesh Adhikary <sup>2,\*</sup>

<sup>1</sup> Department of Physics, University of Mumbai, Mumbai 400098, India; prashantsinghprs@gmail.com (P.S.); pradip.sarawade@physics.mu.ac.in (P.S.)

<sup>2</sup> International Centre for Integrated Mountain Development (ICIMOD), Khumaltar G.P.O. Box 3226, Lalitpur 44700, Nepal

\* Correspondence: Bhupesh.Adhikary@icimod.org

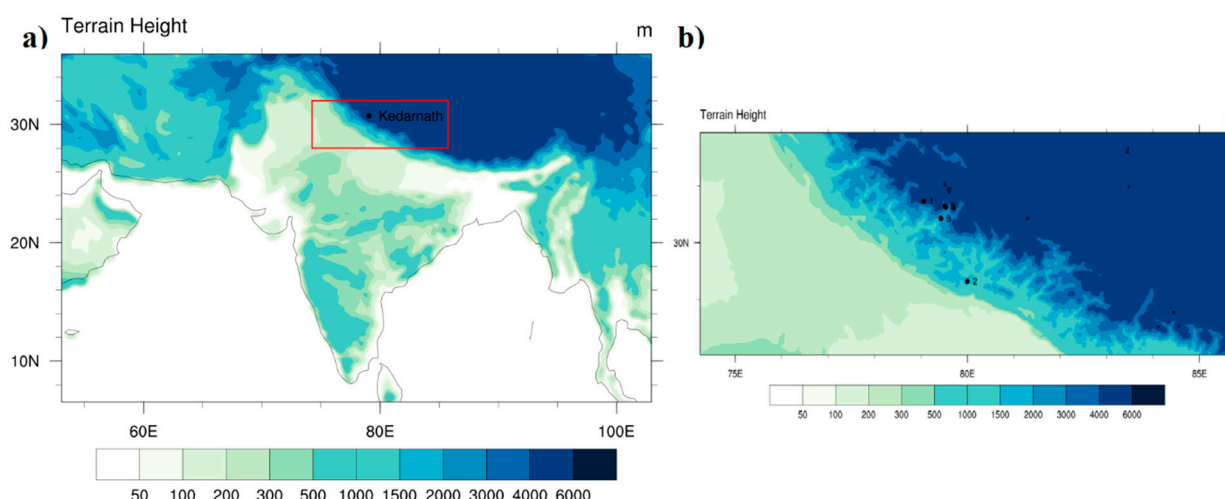

**Figure S1.** (a) Domain of simulation at 25 km resolution, domain of simulation at 4 km resolution (red box) and Kedarnath (black dot). (b) 4 km resolution pointing 1. Kedarnath, 2. Champawat, 3. Pipalkoti, 4. Pandukeshwar, and 5. Lambgarh (4-5 are very close to each other).

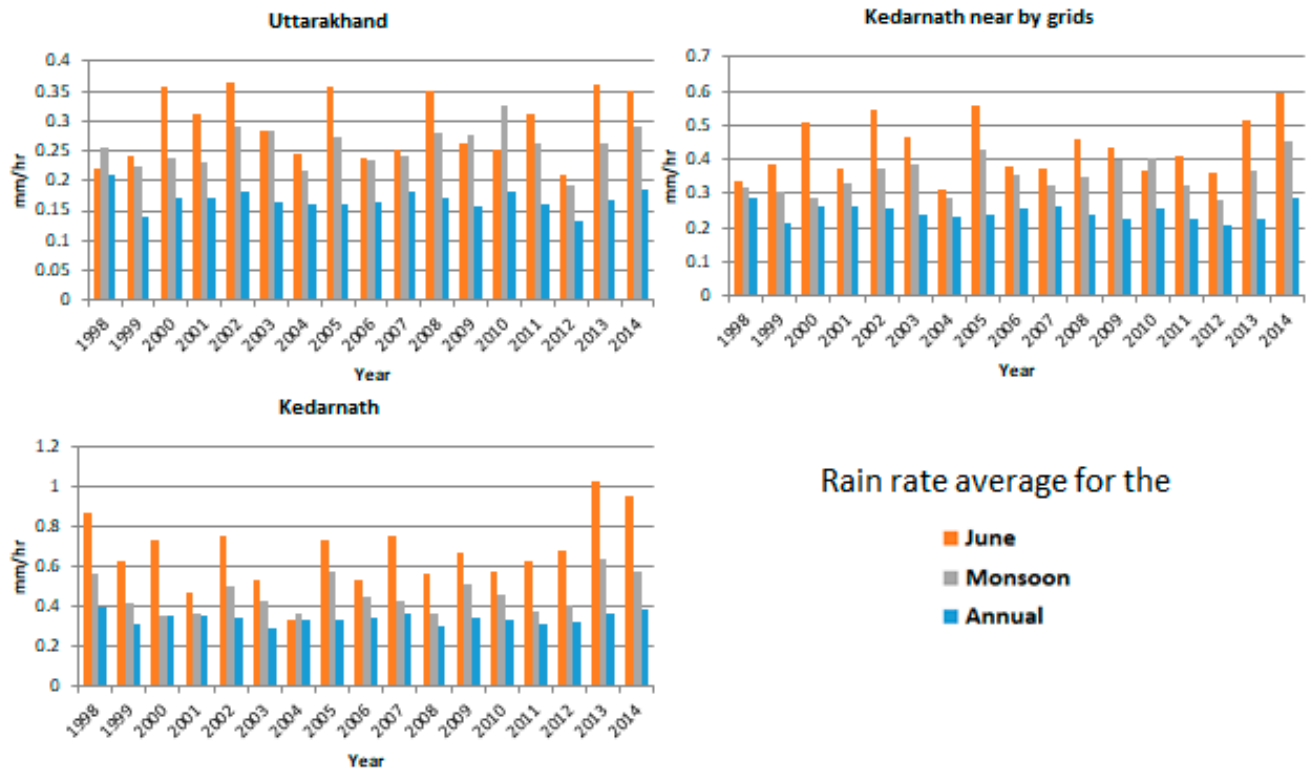

**Figure S2.** Rain rate over Uttarakhand, nearby Kedarnath and over Kedarnath average for annual, monsoon and June month.

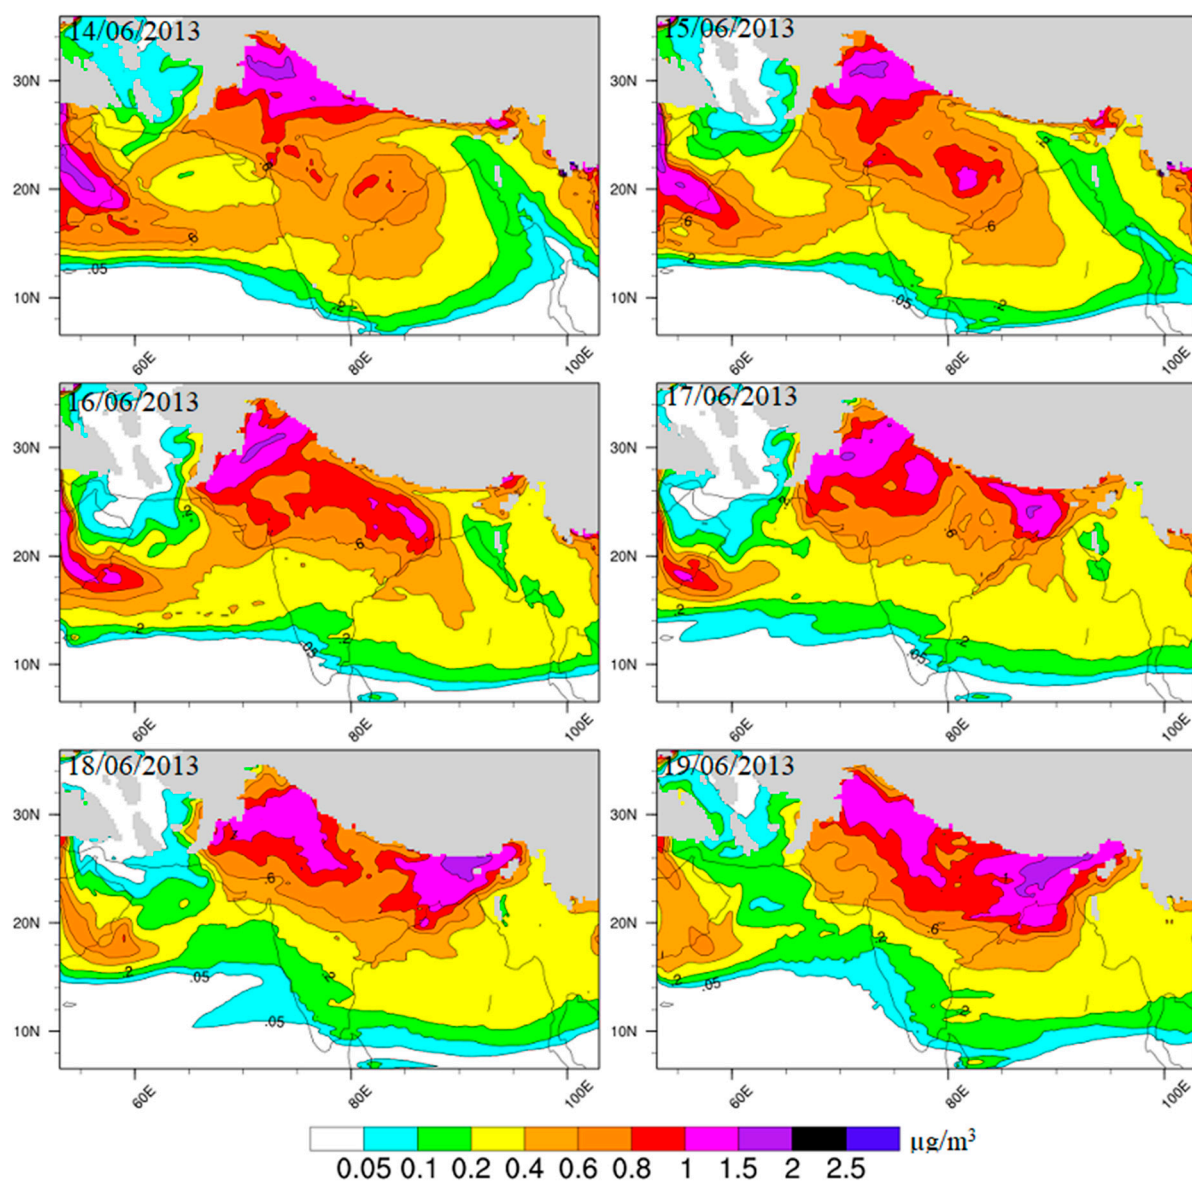

**Figure S3.** BC1 concentration at 850 hPa from 14 June 2013 to 19 June 2013.

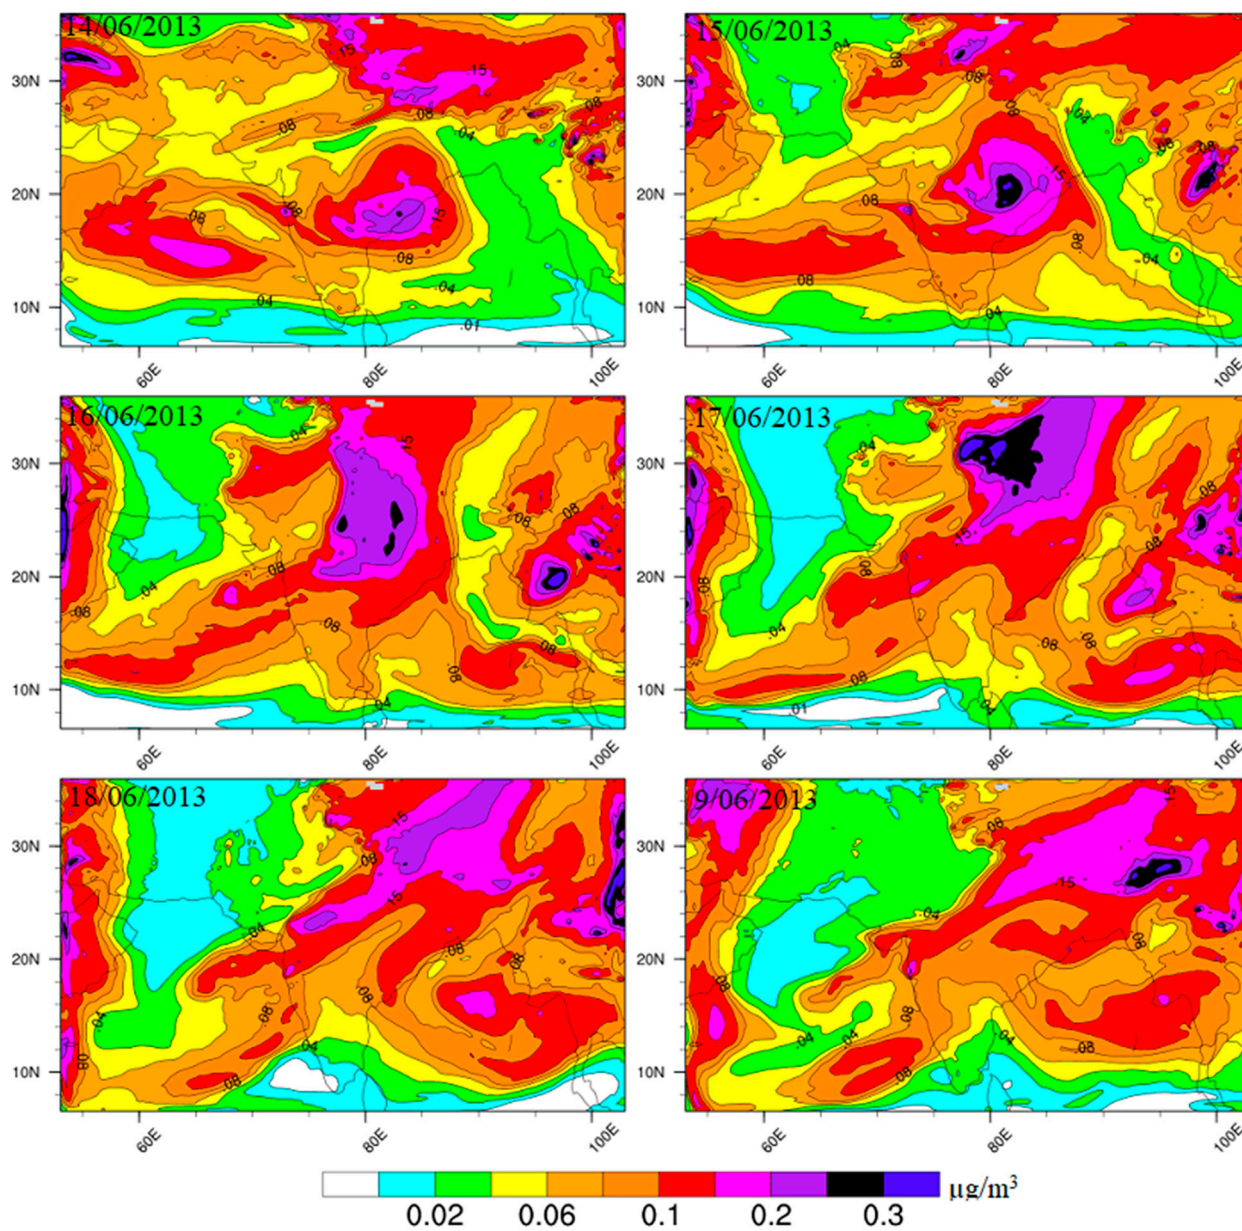

Figure S4. BC1 concentration at 500 hPa from 14 June 2013 to 19 June 2013.

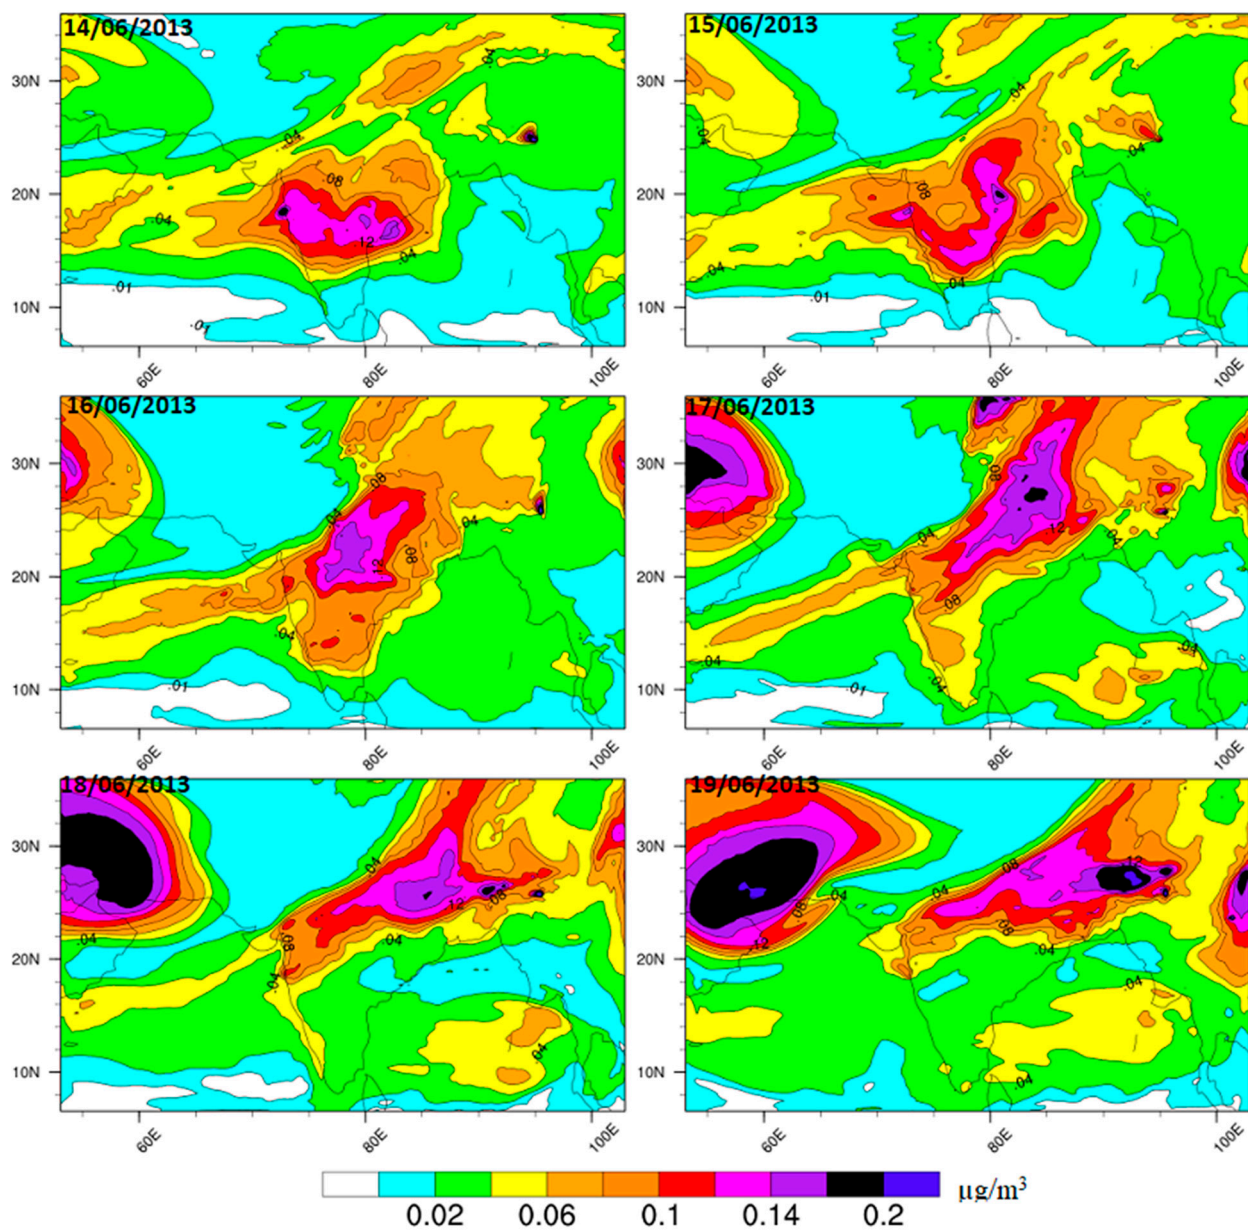

Figure S5. BC1 concentration at 300 hPa from 14 June 2013 to 19 June 2013.



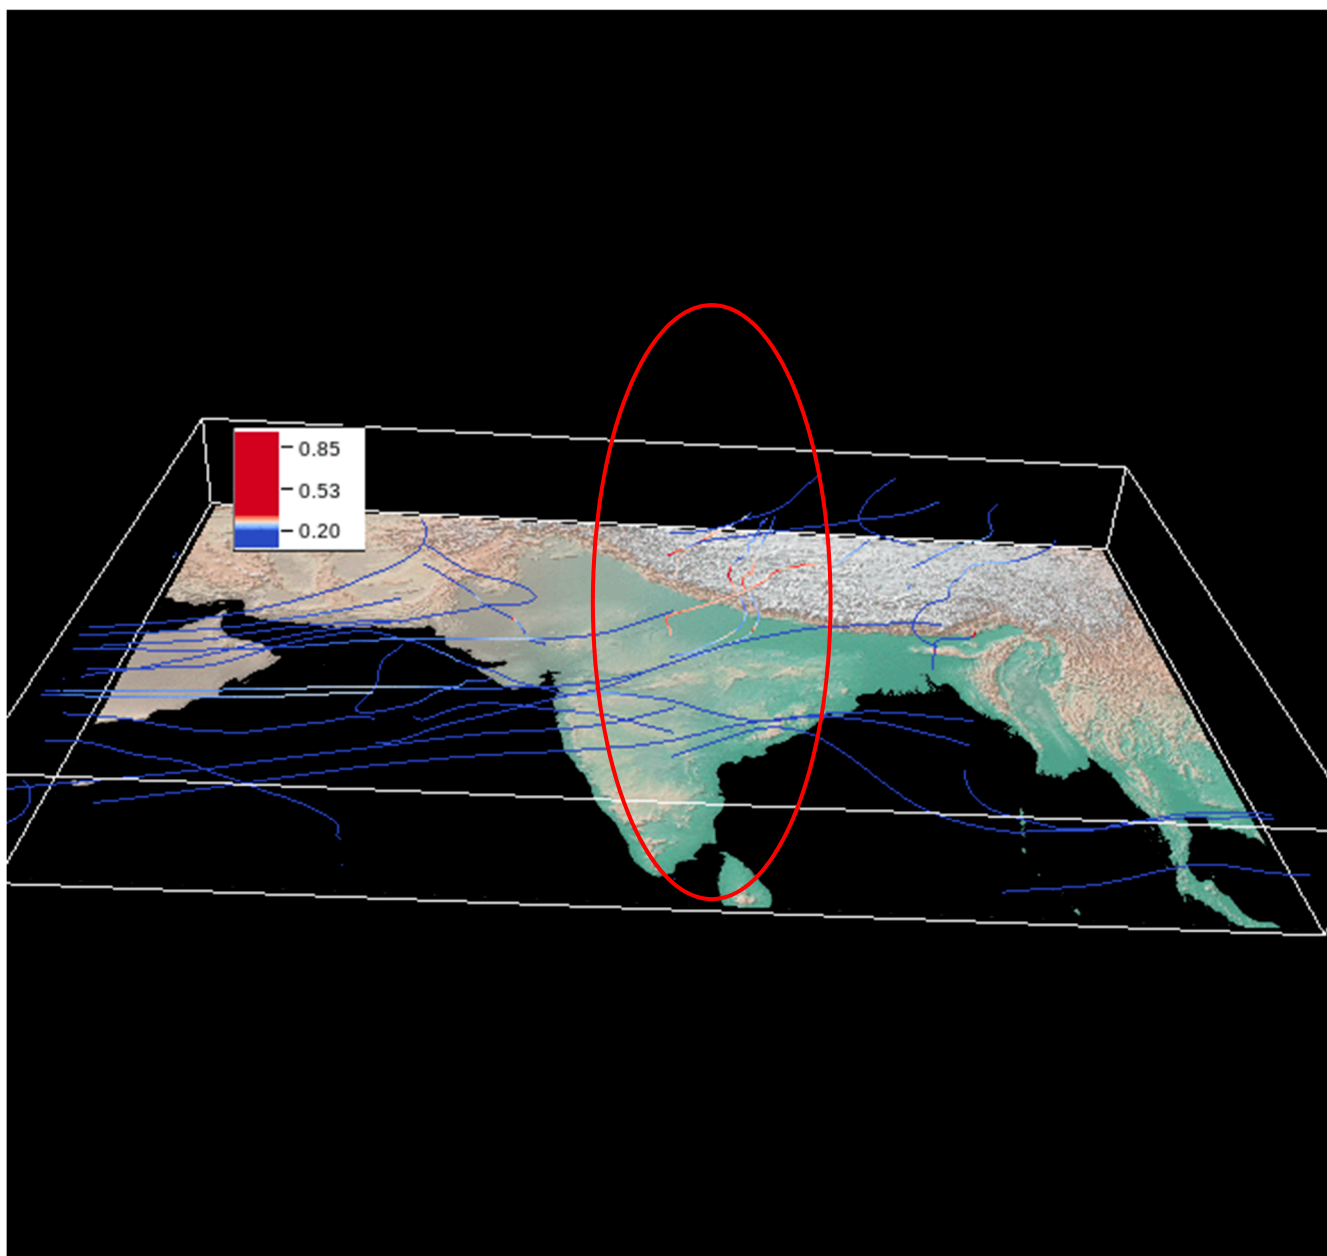

Figure S6. BC1 volume flow on 17 June 2013, 25 km resolution.

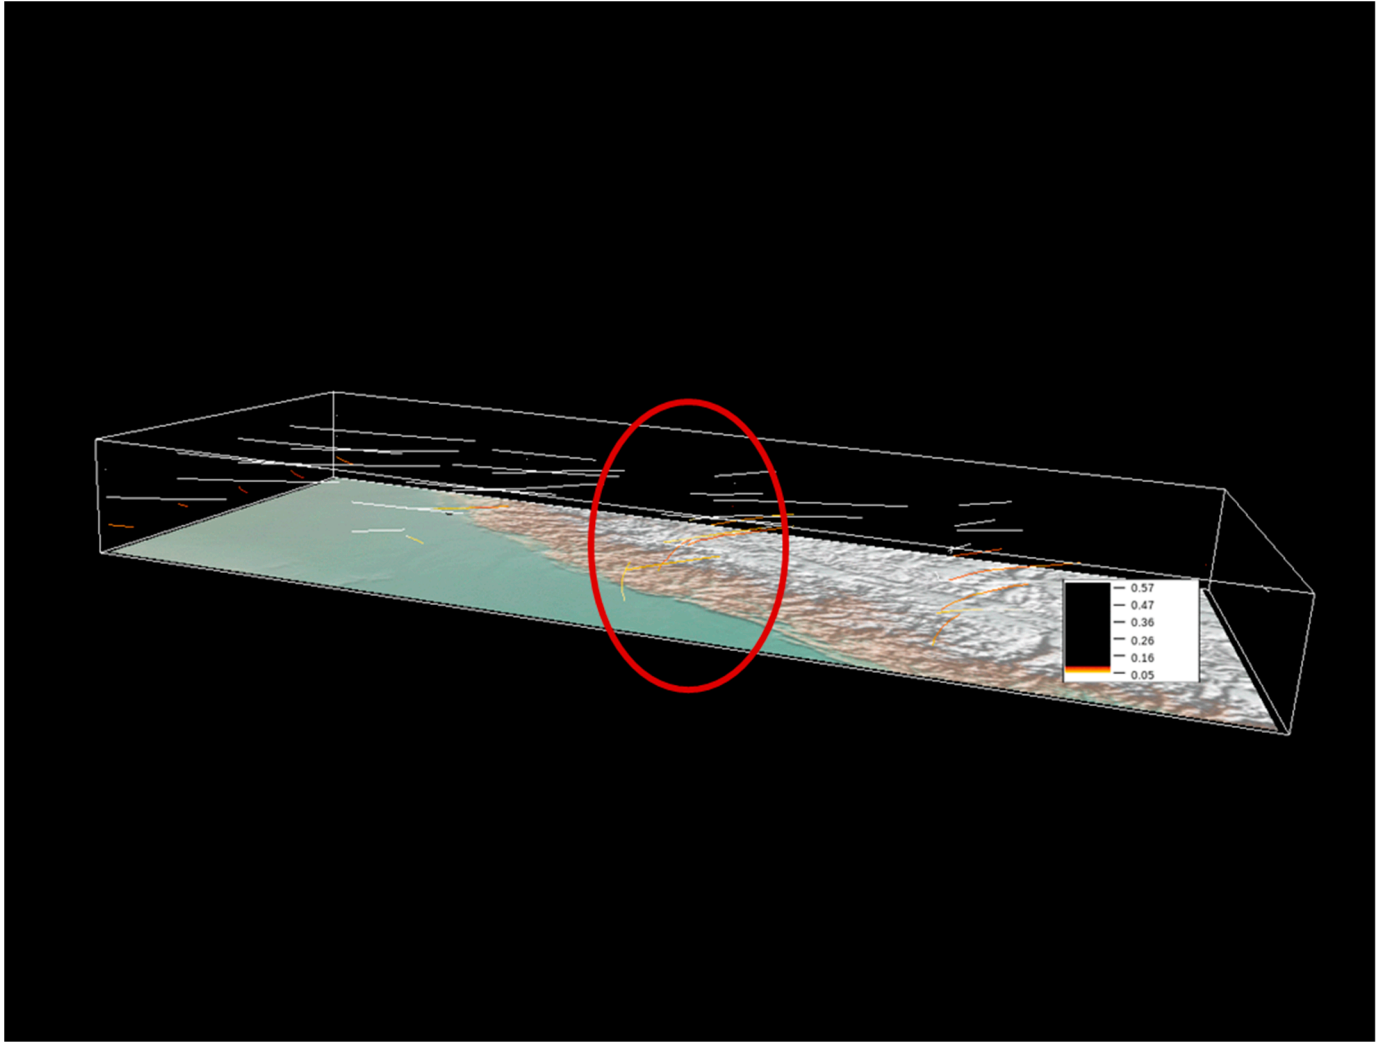

**Figure S7.** BC1 volume flow on 17 June 2013, 4 km resolution.

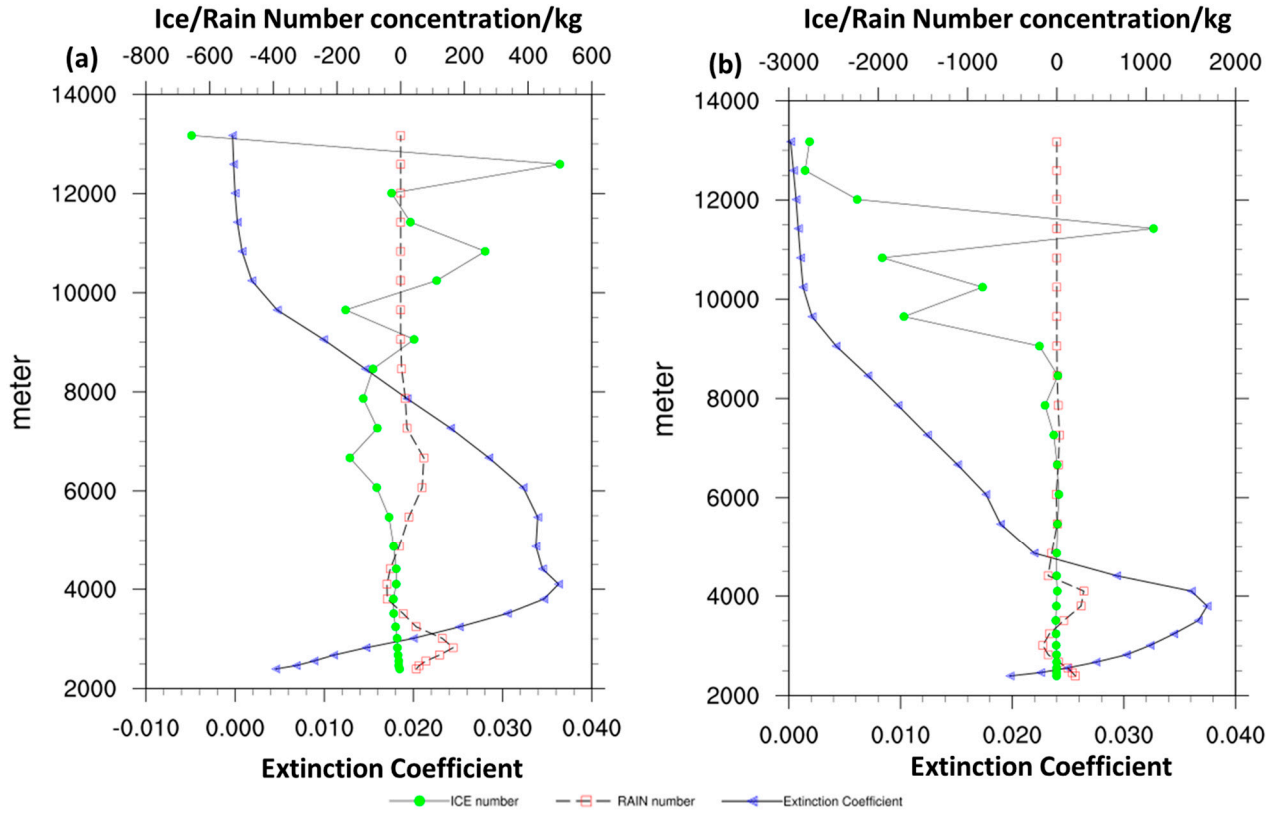

**Figure S8.** Difference of Extinction Coefficient, rain and ice concentration profile over Kedarnath during (a) 16 June and (b) 17 June from WC25, WRF25 simulations.

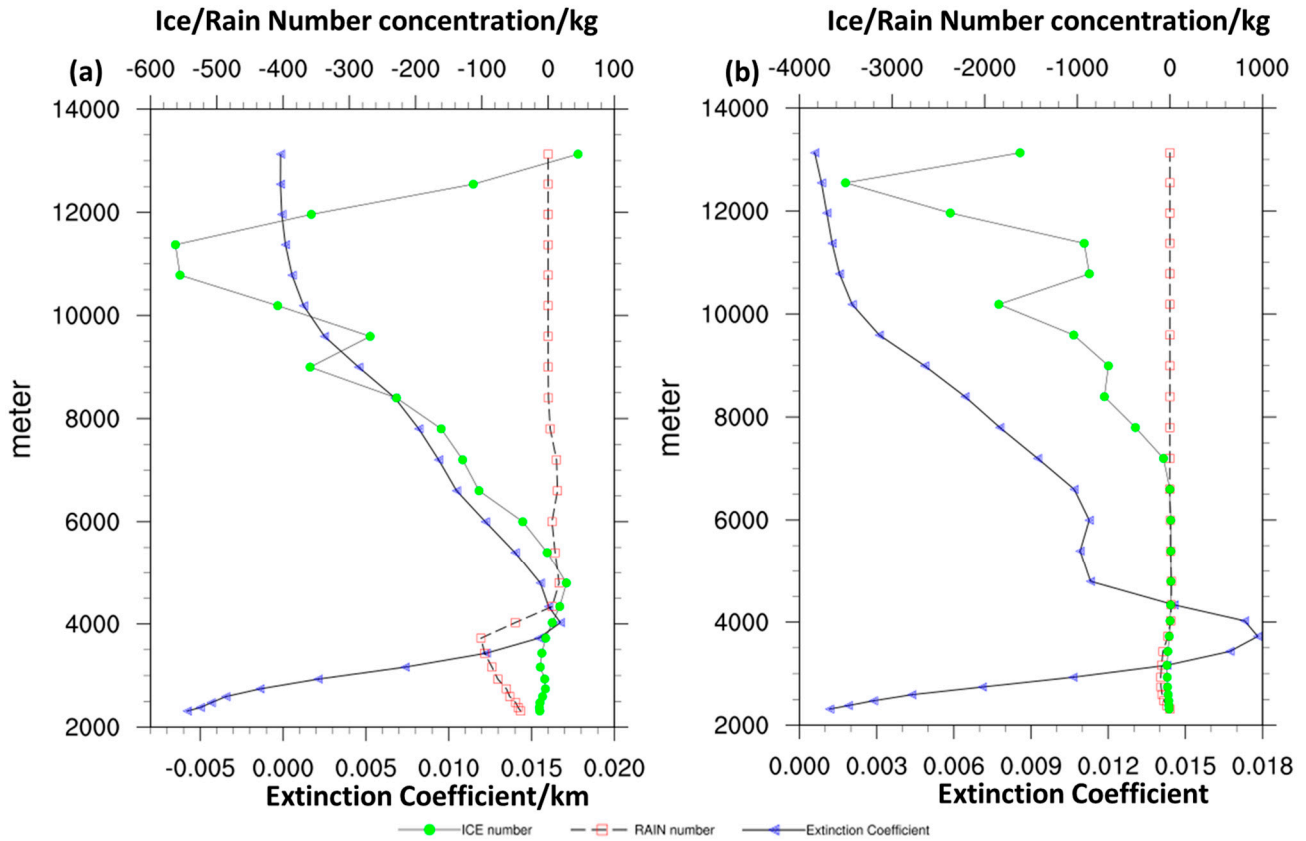

**Figure S9.** Difference of Extinction Coefficient, rain and ice concentration profiles over Kedarnath during (a) 16 June and (b) 17 June from WC4, WRF4 simulations (WC4-WRF4).



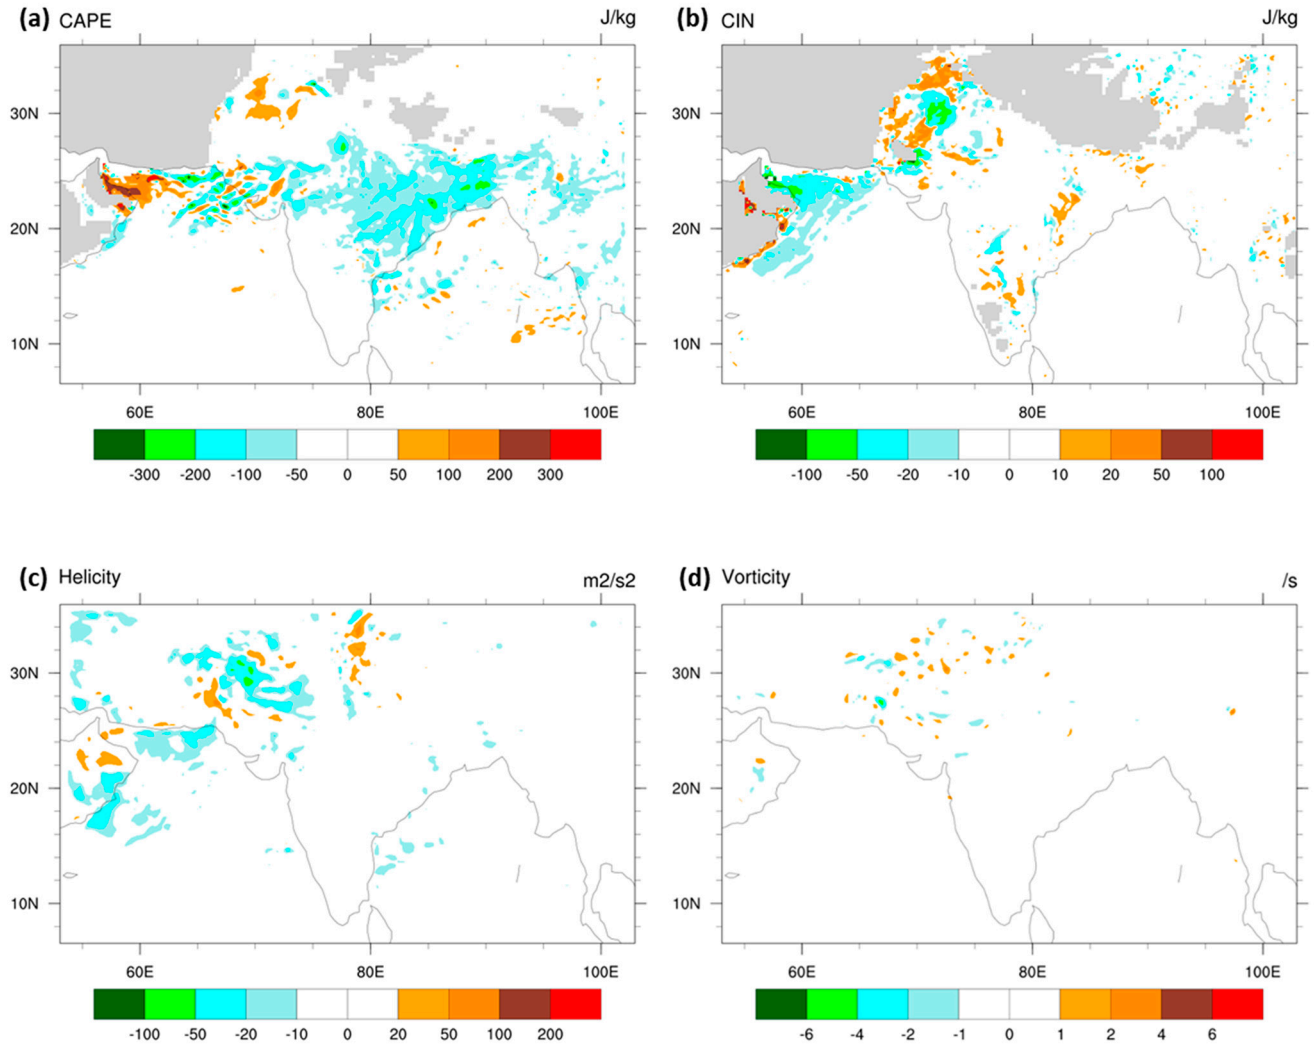

**Figure S10.** Effect of aerosols on (a) CAPE, (b) CIN, (c) helicity and (d) vorticity at 25 km resolution (WC25-WRF25) during 17 June.

**Table S1.** Average rain rate (mm/hr) over Uttarakhand, Kedarnath and nearby area for the period of 1998-2014 from TRMM.

| Year | Uttarakhand |         |        | Kedarnath Nearby Area |         |        | Kedarnath |         |        |
|------|-------------|---------|--------|-----------------------|---------|--------|-----------|---------|--------|
|      | June        | Monsoon | Annual | June                  | Monsoon | Annual | June      | Monsoon | Annual |
| 1998 | 0.22        | 0.26    | 0.21   | 0.34                  | 0.32    | 0.28   | 0.87      | 0.57    | 0.39   |
| 1999 | 0.24        | 0.22    | 0.14   | 0.39                  | 0.31    | 0.21   | 0.63      | 0.42    | 0.31   |
| 2000 | 0.36        | 0.24    | 0.17   | 0.51                  | 0.29    | 0.26   | 0.73      | 0.36    | 0.35   |
| 2001 | 0.31        | 0.23    | 0.17   | 0.37                  | 0.33    | 0.26   | 0.48      | 0.36    | 0.35   |
| 2002 | 0.36        | 0.29    | 0.18   | 0.55                  | 0.38    | 0.26   | 0.76      | 0.50    | 0.35   |
| 2003 | 0.28        | 0.28    | 0.17   | 0.46                  | 0.38    | 0.24   | 0.54      | 0.43    | 0.29   |
| 2004 | 0.24        | 0.22    | 0.16   | 0.31                  | 0.29    | 0.23   | 0.34      | 0.37    | 0.34   |
| 2005 | 0.36        | 0.27    | 0.16   | 0.56                  | 0.43    | 0.24   | 0.73      | 0.58    | 0.34   |
| 2006 | 0.24        | 0.23    | 0.16   | 0.38                  | 0.36    | 0.26   | 0.54      | 0.45    | 0.35   |
| 2007 | 0.25        | 0.24    | 0.18   | 0.37                  | 0.33    | 0.27   | 0.75      | 0.43    | 0.37   |
| 2008 | 0.35        | 0.28    | 0.17   | 0.46                  | 0.35    | 0.24   | 0.57      | 0.36    | 0.30   |
| 2009 | 0.26        | 0.28    | 0.16   | 0.44                  | 0.40    | 0.23   | 0.67      | 0.52    | 0.34   |
| 2010 | 0.25        | 0.33    | 0.18   | 0.37                  | 0.40    | 0.26   | 0.58      | 0.46    | 0.34   |
| 2011 | 0.31        | 0.26    | 0.16   | 0.41                  | 0.32    | 0.23   | 0.63      | 0.38    | 0.31   |
| 2012 | 0.21        | 0.19    | 0.13   | 0.36                  | 0.28    | 0.21   | 0.68      | 0.41    | 0.33   |
| 2013 | 0.36        | 0.26    | 0.17   | 0.51                  | 0.37    | 0.23   | 1.03      | 0.64    | 0.36   |
| 2014 | 0.35        | 0.29    | 0.19   | 0.59                  | 0.45    | 0.28   | 0.96      | 0.57    | 0.39   |

**Table S2.** R<sup>2</sup> of precipitation from different simulation with observed precipitation from in situ and satellite observation.

| Simulation   | TRMM | WC25 |      | WRF25 |      | WC4  |      | WRF4 |      |
|--------------|------|------|------|-------|------|------|------|------|------|
| Stations     | Obs. | Obs. | Sat. | Obs.  | Sat. | Obs. | Sat. | Obs. | Sat. |
| Kedarnath    | NA   | NA   | 0.36 | NA    | 0.36 | NA   | 0.40 | NA   | 0.41 |
| Champawat    | 0.52 | 0.40 | 0.95 | 0.63  | 0.70 | 0.60 | 0.74 | 0.60 | 0.74 |
| Nainital     | 0.56 | 0.53 | 0.41 | 0.93  | 0.45 | 0.78 | 0.62 | 0.76 | 0.60 |
| Jolly grant  | 0.60 | 0.31 | 0.32 | 0.02  | 0.01 | 0.28 | 0.06 | 0.21 | 0.04 |
| Dehradun     | 0.32 | 0.28 | 0.27 | 0.14  | 0.02 | 0.41 | 0.06 | 0.36 | 0.03 |
| Lambagrh     | 0.58 | 0.63 | 0.74 | 0.66  | 0.56 | 0.65 | 0.54 | 0.39 | 0.54 |
| Pandukeshwar | 0.49 | 0.23 | 0.74 | 0.41  | 0.56 | 0.36 | 0.56 | 0.36 | 0.56 |
| Pipalkoti    | 0.40 | 0.23 | 0.57 | 0.67  | 0.45 | 0.42 | 0.44 | 0.40 | 0.43 |

**Table S3.**  $\Delta$ concentration for different aerosols and  $\Delta$  in absolute percentage in model column and at 850 hPa, 500 hPa, 300 hPa for 16<sup>th</sup> and 17<sup>th</sup> June 2013 over Kedarnath at 4km resolution.

| Aerosols  | 16 June 2013      |       |                   |        |                   |       |                   |        |
|-----------|-------------------|-------|-------------------|--------|-------------------|-------|-------------------|--------|
|           | $\Delta$ Column   |       | $\Delta$ 850 hPa  |        | $\Delta$ 500 hPa  |       | $\Delta$ 300 hPa  |        |
|           | ug/m <sup>3</sup> | %     | ug/m <sup>3</sup> | %      | ug/m <sup>3</sup> | %     | ug/m <sup>3</sup> | %      |
| BC        | 0.069             | 62.69 | 0.318             | 71.64  | 0.056             | 69.01 | 0.019             | 123.85 |
| OC        | 0.267             | 49.22 | 1.321             | 58.75  | 0.173             | 51.07 | 0.059             | 119.12 |
| DUST1     | 4.135             | 106   | 15.66             | 103.9  | 4.911             | 119   | 0.842             | 163.13 |
| DUST2     | 9.283             | 107.1 | 35.49             | 104.3  | 10.94             | 123.1 | 1.831             | 168.1  |
| DUST3     | 6.174             | 110.1 | 23.76             | 105.8  | 7.243             | 132.1 | 1.161             | 178.9  |
| DUST4     | 1.829             | 124.1 | 7.276             | 112.3  | 2.063             | 169.8 | 0.307             | 204.4  |
| DUST5     | 0.842             | 179.1 | 3.613             | 142.5  | 0.861             | 263.9 | 0.121             | 245.8  |
| SEA SALT1 | 0.002             | 113.5 | 0.004             | 326.1  | 0.003             | 79.99 | 0.004             | 72.56  |
| SEA SALT2 | 0.015             | 320.5 | 0.039             | 412.5  | 0.029             | 219.4 | 0.005             | 245.5  |
| SEA SALT3 | 0.021             | 345.2 | 0.06              | 359.4  | 0.038             | 268.6 | 0.004             | 1001   |
| SEA SALT4 | 0.0002            | 139.7 | 0.001             | 147.7  | 9E-05             | 188.6 | 5E-06             | 4185   |
| sulf      | -0.012            | -1.28 | -1.49             | -30.99 | 0.321             | 64.39 | 0.161             | 69.71  |
|           | 17 June 2013      |       |                   |        |                   |       |                   |        |
|           | $\Delta$ Column   |       | $\Delta$ 850 hPa  |        | $\Delta$ 500 hPa  |       | $\Delta$ 300 hPa  |        |
|           | ug/m <sup>3</sup> | %     | ug/m <sup>3</sup> | %      | ug/m <sup>3</sup> | %     | ug/m <sup>3</sup> | %      |
| BC        | 0.068             | 62.25 | 0.287             | 64.70  | 0.065             | 79.78 | 0.024             | 154.91 |
| OC        | 0.242             | 44.57 | 1.082             | 48.12  | 0.203             | 59.73 | 0.072             | 146.51 |
| DUST1     | 4.449             | 114   | 16.99             | 112.8  | 6.059             | 146.8 | 0.947             | 183.51 |
| DUST2     | 9.998             | 115.4 | 38.55             | 113.3  | 13.52             | 152.2 | 2.078             | 190.90 |
| DUST3     | 6.687             | 119.3 | 26.04             | 115.9  | 9.0213            | 164.6 | 1.339             | 206.4  |
| DUST4     | 2.003             | 135.9 | 8.062             | 124.1  | 2.614             | 215.2 | 0.371             | 246.2  |
| DUST5     | 0.923             | 196.9 | 3.857             | 152.1  | 1.119             | 343.1 | 0.155             | 315.1  |
| SEA SALT1 | 0.002             | 97.29 | 0.004             | 353.4  | 0.002             | 51.76 | 0.003             | 58.84  |
| SEA SALT2 | 0.011             | 234.4 | 0.042             | 436.6  | 0.01              | 79.35 | 0.004             | 198.68 |
| SEA SALT3 | 0.012             | 204.2 | 0.053             | 315.7  | 0.01              | 76.25 | 0.002             | 595.5  |
| SEA SALT4 | 2E-05             | 13.39 | 1E-04             | 9.75   | 1E-05             | 188.7 | 1E-06             | 1533   |
| sulf      | -0.026            | -2.61 | -1.157            | -23.57 | 0.205             | 27.56 | 0.023             | 21.25  |
